# Supplementary material for: Possible Implication of Hypoxia-mediated Incomplete Neutrophil Extracellular Trap Formation in Pneumonia-induced Exacerbation of Lung Diseases
Source: Research Square preprint supplement (doi:10.21203/rs.3.rs-388216/v1), 2021-04-09
Supplement: Supplementary file 1 [file 646a6ed39f7a20e7738a6050.pdf]

No treatment

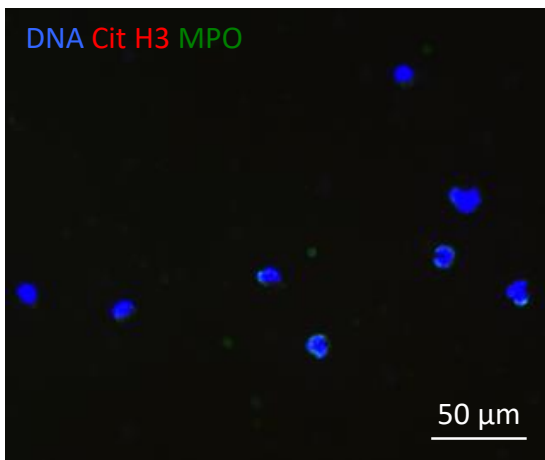

PMA 20 nM

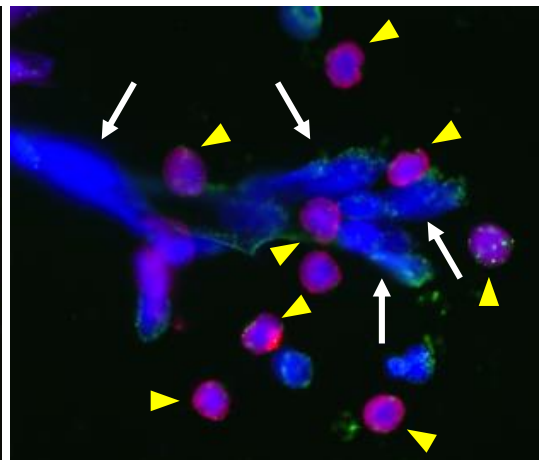

**Figure S2. Morphology of NETs**

Peripheral blood neutrophils were stimulated with 20 nM PMA for 4 hours under normoxic (20% O<sub>2</sub>) conditions. White arrows and yellow arrowheads represent lytic NETs and round NETs, respectively.
